# Supplementary material
Source: MDPI journal article supplement (https://www.mdpi.com/2071-1050/15/4/3337)
Supplement: s1 [file s1]

## Supplementary material

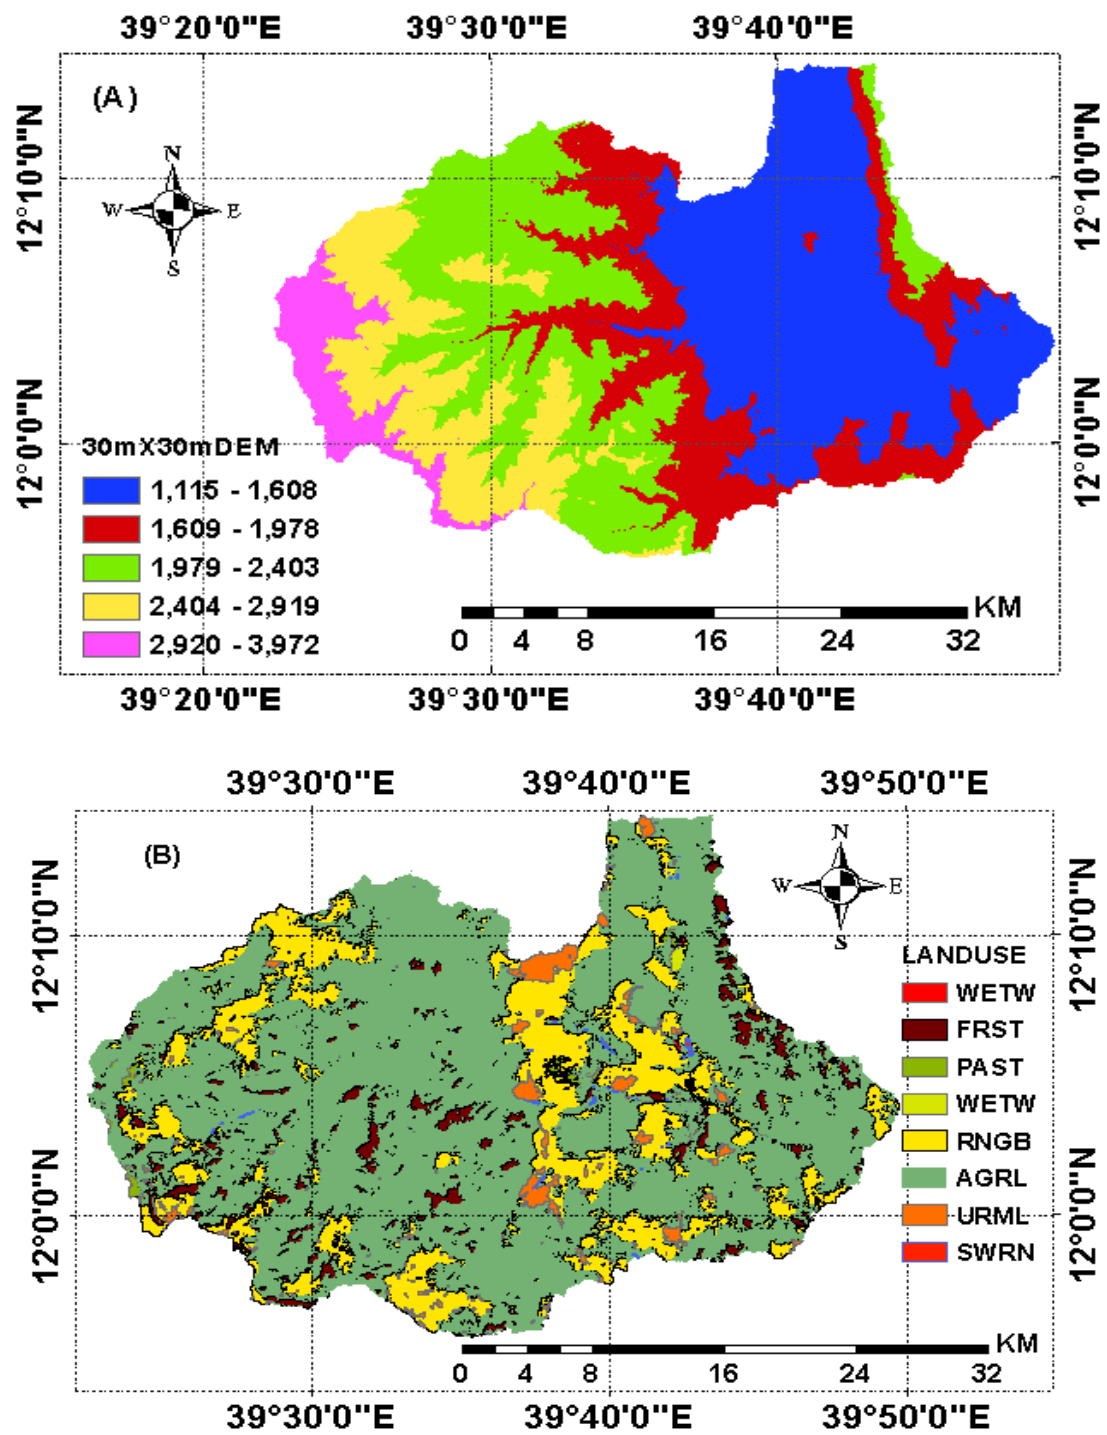

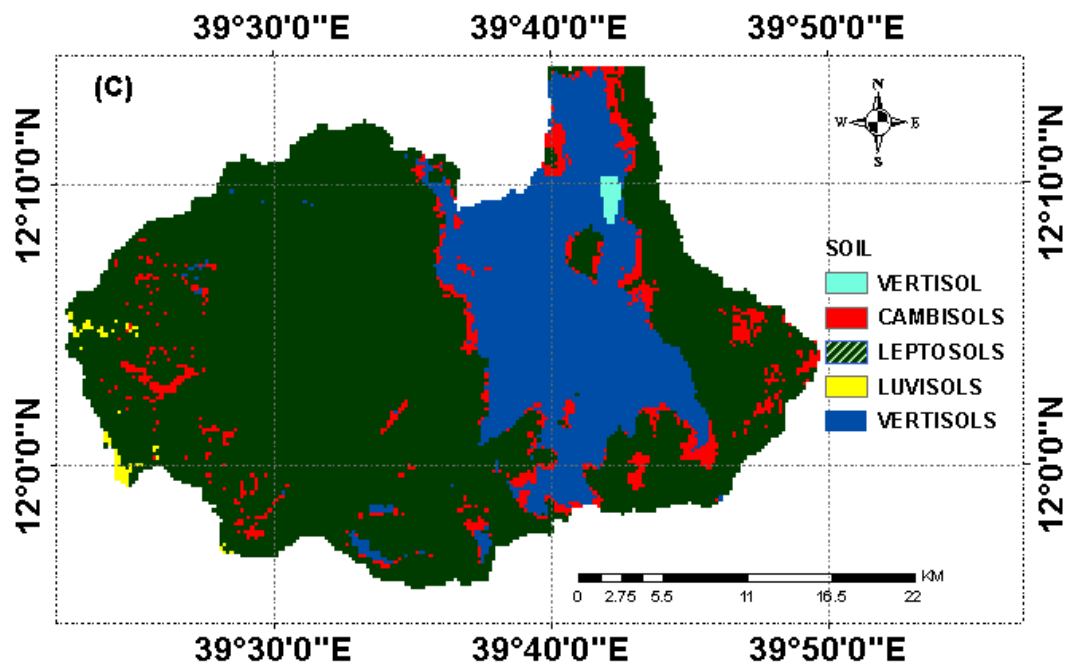

**Figure S1.** Physical land resources of the study area A) DEM, B) Land use, C) Soil; Note: URML (Urban Medium Density), AGRL (Agricultural land generic), FRST (Forest), RNGB (Range Shrubland), South Western Range +Bed rock (SWRN), PAST (Pasture land), WETW (Water).

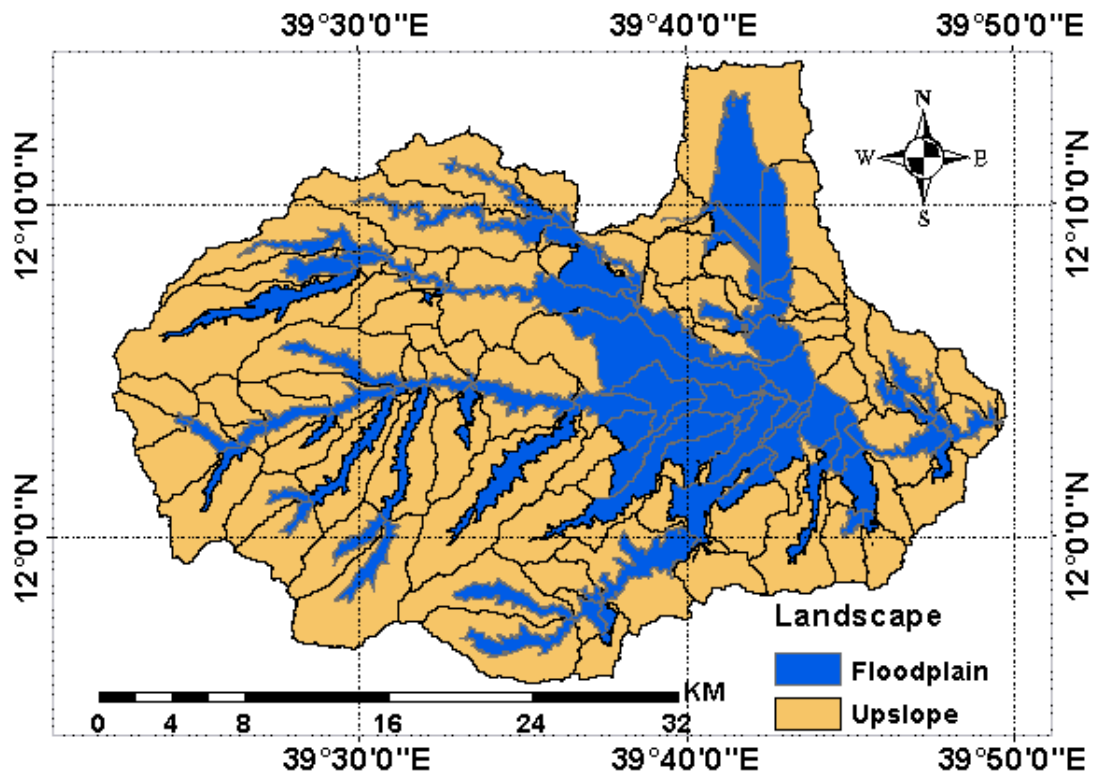

Figure S2. Landscape of the study area.

Table S1: Parameter range and change type to simulated SWAT using MODIS AET and GloFAS river flow

| SWAT<br>parameter | Parameter<br>Description                                                               | Change type | min  | max  | units                      |
|-------------------|----------------------------------------------------------------------------------------|-------------|------|------|----------------------------|
| CN2.hru           | SCS runoff<br>curve<br>number for<br>moisture<br>condition II                          | Percent     | -20  | 20   |                            |
| Esco. hru         | Soil<br>evaporation<br>compensation<br>factor                                          | replace     | 0    | 1    |                            |
| Epc. hru          | Plant uptake<br>compensation<br>factor                                                 | Replace     | 0    | 1    |                            |
| Canmx. hru        | Maximum<br>canopy<br>storage                                                           | Relative    | -1.5 | -1   | mm/H <sub>2</sub> O        |
| Perco. hru        | Percolation<br>coefficient                                                             | Replace     | 0.3  | 0.6  | fraction                   |
| k.sol             | Saturated<br>hydraulic<br>conductivity                                                 | Relative    | 5    | 55   | mm/hr                      |
| Alpha. aqu        | Base flow<br>alpha factor                                                              | Replace     | 0    | 0.98 | days                       |
| revap_min.<br>aqu | Threshold<br>depth of<br>water in the<br>shallow<br>aquifer for<br>“revap” to<br>occur | Replace     | 100  | 500  | mm                         |
| cn3_swf.hru       | Pothole<br>evaporation<br>coefficient                                                  | Percent     | -60  | 30   |                            |
| awc.sol           | Available<br>water<br>capacity of<br>the soil layer                                    | Relative    | -0.5 | 0.5  | Mm/<br>H <sub>2</sub> O/mm |

|             |                                                          |         |   |   |         |
|-------------|----------------------------------------------------------|---------|---|---|---------|
| flo_min.aqu | Minimum<br>aquifer<br>storage to<br>allow return<br>flow | Replace | 0 | 8 | mm      |
| Bd.sol      | Moist Bulk<br>density                                    | Replace | 0 | 1 | Mg/m**3 |
| Bd.sol      | Moist Bulk<br>density                                    | Replace | 0 | 1 | g/cm**3 |

---
